# Supplementary material for: Localized temporal co-delivery of interleukin 10 and decorin genes using amediated by collagen-based biphasic scaffold modulates the expression of TGF-β1/β2 in a rabbit ear hypertrophic scarring model
Source: Royal Society of Chemistry journal article supplement (doi:10.1039/d0bm01928c), 2021-01-01
Supplement: d0bm01928c1.pdf [file d0bm01928c1.pdf]

**Supporting Information**

**Localized temporal co-delivery of interleukin 10 and decorin genes using a mediated by collagen-based biphasic scaffold modulates the expression of TGF- $\beta$ 1/ $\beta$ 2 in a rabbit ear hypertrophic scarring model**

Ciarstan McArdle<sup>#</sup>, Sunny Akogwu Abbah<sup>#</sup>, Sirsendu Bhowmick<sup>#</sup>, Estelle Collins and Abhay Pandit<sup>\*</sup>

CÚRAM, SFI Research Centre for Medical Devices, Biomedical Sciences, National University of Ireland Galway, Ireland

---

**\*Corresponding Author:** Prof. Abhay Pandit, CÚRAM, SFI Research Centre for Medical Devices, Biomedical Sciences, National University of Ireland Galway, Ireland.  
Email: abhay.pandit@nuigalway.ie

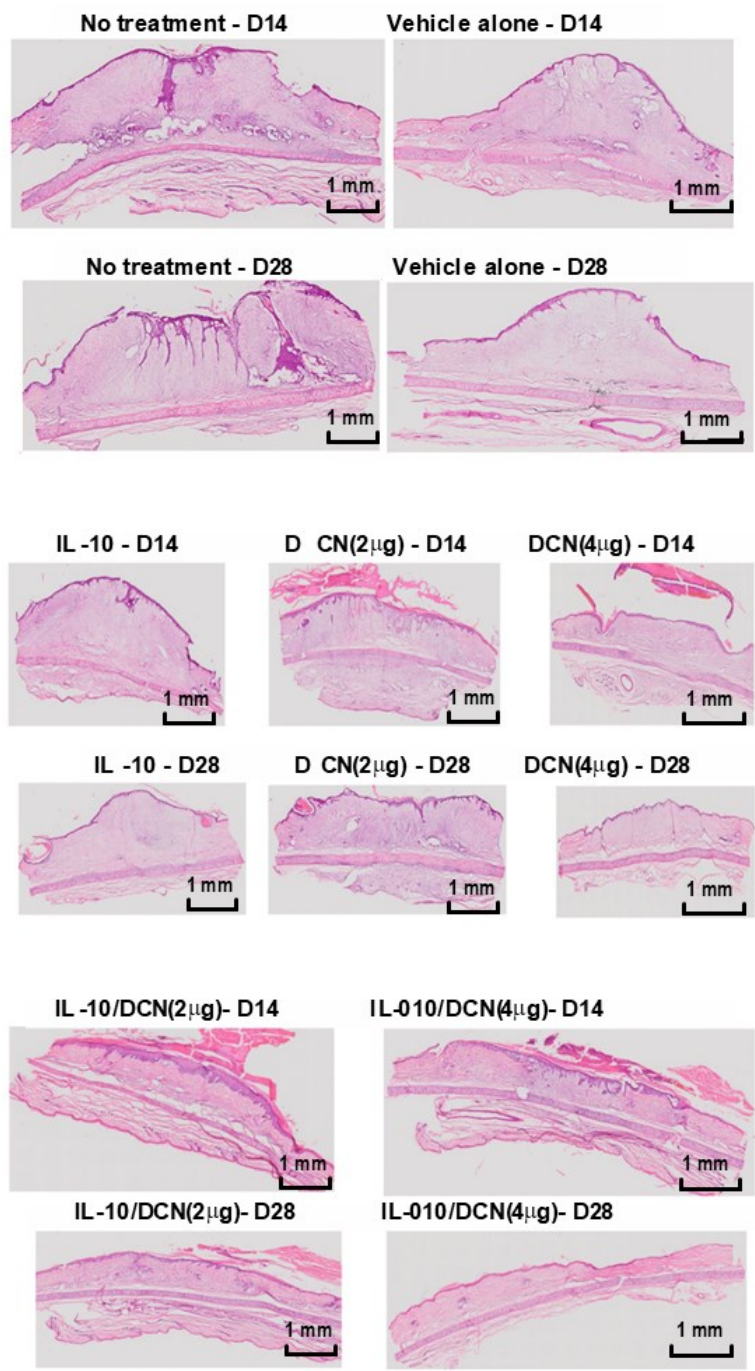

Figure S1. Whole H&E stained tissue sections of hypertrophic scarring at postoperative days (14 & 28 days).

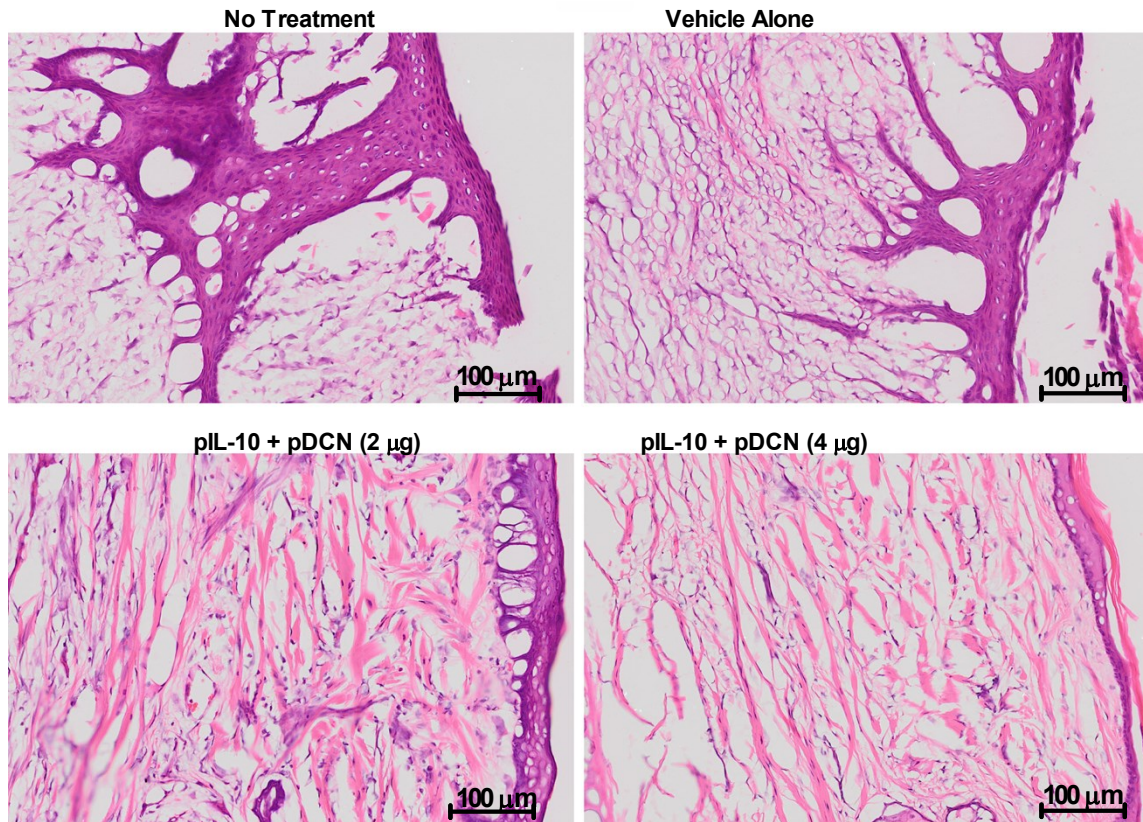

Figure S2. The histology features of fibrotic wound healing and scar formation in treatment groups.

The catalogue numbers of antibodies used for IHC:

1. Anti-IL-10 antibody (Interleukin 10) from Antibodies-online GmbH: Catalog No. ABIN1861543
2. Anti-Decorin antibody - N-terminal from Abcam: Catalog No. ab189071
3. TGF- $\beta$ 1 antibody (Transforming Growth Factor, beta 1) (AA 286-293) from Antibodies-online GmbH: Catalog No. ABIN1740010
4. TGF- $\beta$ 3 antibody from R&D Systems Eire Catalog No. MAB643-100
5. Collagen I Antibody from Novus Biologicals Catalog No. NB600-408-0.1mg
6. Collagen III alpha 1 / COL3A1 Antibody (1E7-D7 / Col3) - BSA Free from Novus Biologicals Catalog No. NBP1-05119

Table S1: The primer sequences used for gene expression

| <b>Gene</b>                    | <b>Primer Sequence</b>            |
|--------------------------------|-----------------------------------|
| <b>IL-10</b>                   | F: CCTGCCTAACATGCTTCGAG (20)      |
|                                | R: GGCAACCCAGGTAACCCTTA (20)      |
| <b>Decorin</b>                 | F: TGGCAACAAAATCAGCAGAG (20)      |
|                                | R: GCCATTGTCAACAGCAGAG (19)       |
| <b>TGF-<math>\beta</math>1</b> | F: TGCGGCAGCTGTACATTGAC (20)      |
|                                | R: GGCAGAAGTTGGCGTGGTA (19)       |
| <b>TGF-<math>\beta</math>2</b> | F: GTCCAACCGGCGGAAGA (17)         |
|                                | R: CAGCAATTATCCTGCACATTTCTAA (25) |
| <b>TGF-<math>\beta</math>3</b> | F: CGGCTCAAGAAGCAGAAGGA (20)      |
|                                | R: CGGTGCGGTGGAATCATC (18)        |
| <b>Collagen I</b>              | F: AGCGATGGTCCTCCAGGT (18)        |
|                                | R: GCCAGGGTAACCACGTTCT (19)       |
| <b>Collagen III</b>            | F: AGATGGAGAATCAGGAC (17)         |
|                                | R: TTCATCCAGGGAAGCCA (18)         |
